# Supplementary material
Source: PubMed Central journal article supplement (PMC4254798)
Supplement: NIHMS632875-supplement-01.pdf [file NIHMS632875-supplement-01.pdf]

**Table S1.** Classification Algorithm Employed at 36 Months

| <b>Diagnostic Classification</b> | <b>Algorithmic Criteria</b>                                                                                                                                                                                                                                                                  | <b>Sample Size</b><br>N=719 |
|----------------------------------|----------------------------------------------------------------------------------------------------------------------------------------------------------------------------------------------------------------------------------------------------------------------------------------------|-----------------------------|
| <b>ASD</b>                       | CBE diagnosis of ASD and ADOS severity score $\geq 4$                                                                                                                                                                                                                                        | 157<br>(21.8%)              |
| <b>ATYP</b>                      | No CBE diagnosis of ASD above and at least one of the following: <ul style="list-style-type: none"> <li>- ADOS severity score <math>\geq 3</math></li> <li>- 2 or more MSEL subtest t scores <math>&lt; 35</math></li> <li>- 1 or more MSEL subtest t scores <math>&lt; 30</math></li> </ul> | 178<br>(24.8%)              |
| <b>TYP</b>                       | No CBE diagnosis of ASD above and all of the following: <ul style="list-style-type: none"> <li>- ADOS severity <math>\leq 2</math></li> <li>- 0 or 1 MSEL subtest t scores <math>&lt; 35</math></li> <li>- 0 MSEL subtest t scores <math>&lt; 30</math></li> </ul>                           | 384<br>(53.4%)              |

Note: Mullen Scales of Early Learning (MSEL) subtests considered are Fine Motor, Visual Reception, Receptive Language, and Expressive Language. ASD = autism spectrum disorder; ATYP = atypical development; CBE = clinical best estimate; TYP = typical development.

**Table S2.** Characteristics of Children With Autism Spectrum Disorder (ASD) Who Were Correctly Classified and Misclassified in the Classification and Regression Tree (CART) Analysis

| Variable                                          | ASD Group            |               | p-value |
|---------------------------------------------------|----------------------|---------------|---------|
|                                                   | Classified Correctly | Misclassified |         |
| N (%)                                             | 69 (56.6)            | 53 (43.4)     |         |
| Male (%) (n=93)                                   | 52 (55.9)            | 41 (44.1)     | .79     |
| Females (%) (n=29)                                | 17 (58.6)            | 12 (41.4)     |         |
| Age of Recruitment, months                        | 8.3 (3.8)            | 8.1 (3.4)     | .84     |
| Age of Assessment, months                         | 18.5 (.69)           | 18.5 (.61)    | .95     |
| % Caucasian                                       | 83.9                 | 78.7          | .66     |
| % Hispanic                                        | 12.1                 | 9.1           | .93     |
| Maternal Age, years                               | 33.7 (4.9)           | 33.8 (4.4)    | .98     |
| Paternal Age, years                               | 36.0 (5.4)           | 36.2 (5.4)    | .83     |
| Maternal Education:<br>% college degree or higher | 64.9                 | 72.5          | .57     |
| Paternal Education:<br>% college degree or higher | 61.0                 | 70.7          | .43     |
